# Supplementary figures and images for: Prognostic impact of plasma volume status during hospital admission in patients with acute decompensated heart failure
Source: PubMed Central journal article supplement — ESC Heart Fail. 2024 May 28;11(4):1995–2000. doi: 10.1002/ehf2.14874 (PMC11287322; doi:10.1002/ehf2.14874), 2024-05-28

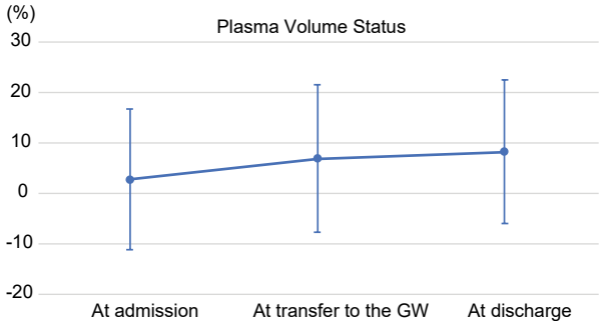

Supplement: EHF2-11-1995-s001.pdf [file EHF2-11-1995-s001.pdf]
